# Supplementary material for: Phase transition and aggregation behaviour of an UCST-type copolymer poly(acrylamide-co-acrylonitrile) in water: effect of acrylonitrile content, concentration in solution, copolymer chain length and presence of electrolyte
Source: Royal Society of Chemistry journal article supplement (doi:10.1039/c6sm02262f), 2016-12-20
Supplement: c6sm02262f1.pdf [file c6sm02262f1.pdf]

## Supporting Information

### Phase Transition and Aggregation Behaviour of an UCST- type Copolymer Poly(Acrylamide-co-Acrylonitrile) in Water: Effect of Acrylonitrile Content, Concentration in Solution, Copolymer Chain Length and Presence of Electrolyte Transition

Asad Asadujjaman,<sup>a</sup> Ben Kent<sup>b</sup> and Annabelle Bertin\*<sup>a, c</sup>

<sup>a</sup>Federal Institute for Material Research and Testing (BAM), Unter den Eichen 87, 12205 Berlin, Germany

<sup>b</sup>Helmholtz-Zentrum Berlin (HZB), Hansn-Meitner-Platz 1, 14109 Berlin, Germany

<sup>c</sup>Freie Universität Berlin, Institute of Chemistry and Biochemistry– Organic Chemistry, Takustr. 3, 14195 Berlin, Germany

#### Synthesis of poly(AAm-co-AN):

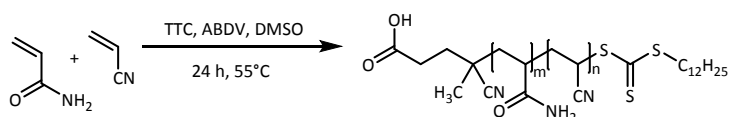

Fig. S1 Polymerization scheme of poly(AAm-co-AN) copolymers.

Table S1. Summary of the synthesis of poly(AAm-co-AN) copolymers with varying AN contents.

| Sample Name | Acrylamide [g] | Acrylonitrile [mL] | TTC [mg] | ABDV [mg] | Yield % |
|-------------|----------------|--------------------|----------|-----------|---------|
| P1          | 4.75           | 0.48               | 60.0     | 4.0       | 67      |
| P2          | 4.52           | 0.70               | 60.0     | 4.0       | 61      |
| P3          | 4.30           | 0.90               | 60.0     | 4.0       | 59      |
| P4          | 4.10           | 1.10               | 60.0     | 4.0       | 65      |
| P5          | 3.96           | 1.21               | 60.0     | 4.0       | 63      |
| P6          | 3.83           | 1.33               | 60.0     | 4.0       | 61      |
| P7          | 3.59           | 1.56               | 60.0     | 4.0       | 60      |

#### Characterization of poly(AAm-co-AN):

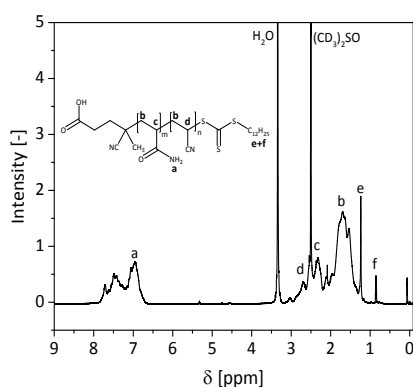

Fig. S2 <sup>1</sup>H-NMR spectrum (400 MHz, DMSO-d<sub>6</sub>) of poly(AAm-co-AN) (sample P4,  $F_{AN}$ =0.144).

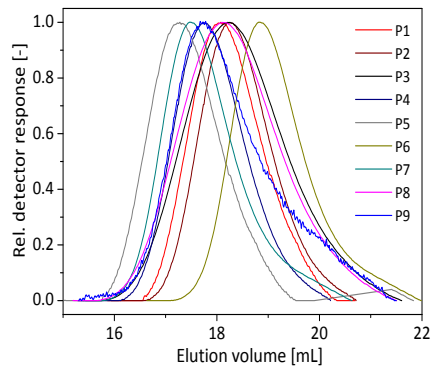

Fig. S3 GPC traces of poly(AAm-co-AN) .

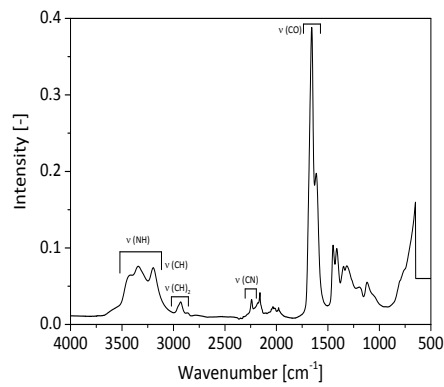

Fig. S4 ATR-FTIR spectrum of poly(AAm-co-AN) with acrylonitrile feed content of 0.225 % (Sample P4,  $F_{AN}=0.144$ ).

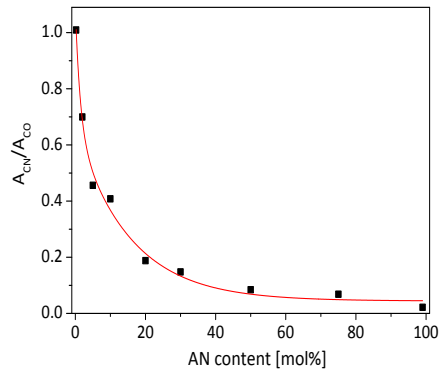

Fig. S5 Calibration curve used for the determination of the copolymer compositions of poly(AAm-co-AN). Standard homopolymer of polyacrylamide and polyacrylonitrile were thoroughly mixed. For the calibration, the carbonyl (C=O) peak from the copolymer at wavelength  $1655\text{ cm}^{-1}$  and nitrile peak (C≡N) from acrylonitrile group at wavelength  $2240\text{ cm}^{-1}$  were compared. The ratio between them is plotted against acrylonitrile content.

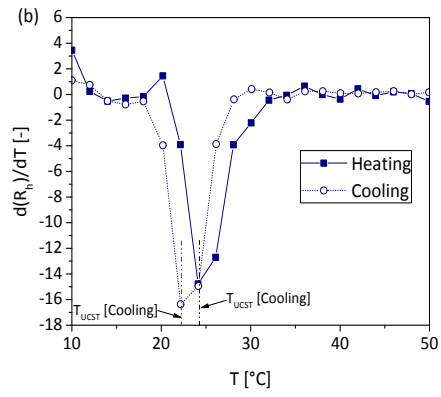

Fig. S6 First derivative of the  $R_h$  against temperature ( $T$ ) curve in the heating and cooling cycle with concentration of 5 mg/mL (sample P4,  $F_{AN}=0.144$ ).

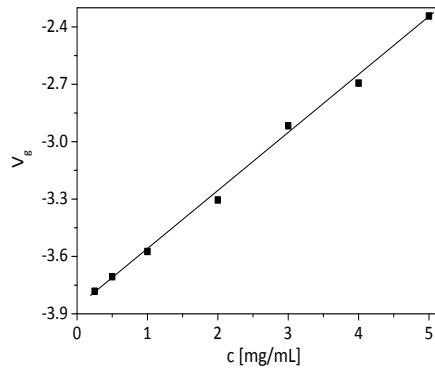

Fig. S7 Determination of refractive index increment ( $dn/dc$ ) of poly(AAm-co-AN) copolymer ( $F_{AN} = 0.144$ ) using dndc 2010 instrument (PSS, Germany).
